# Supplementary material
Source: PubMed Central journal article supplement (PMC3645563)
Supplement: 1218751110_pnas.201218751SI.pdf [file 1218751110_pnas.201218751SI.pdf]

# Supporting Information

John et al. 10.1073/pnas.1218751110

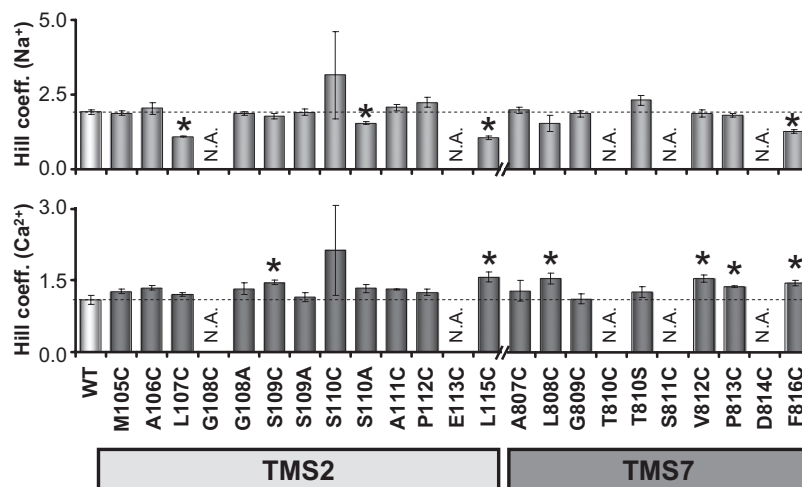

**Fig. S1.** Properties of mutated Na<sup>+</sup>-Ca<sup>2+</sup> exchangers (NCXs). Hill coefficient values for NCX1.1 mutants investigated in this study. *Upper* shows values (given as mean  $\pm$  SE) obtained by fitting the Na<sup>+</sup> dependency curves, whereas *Lower* shows values related to Ca<sup>2+</sup> binding. Values statistically different from WT are marked with an asterisk ( $P < 0.05$ ). Mutants with no measurable activity are indicated as N.A.



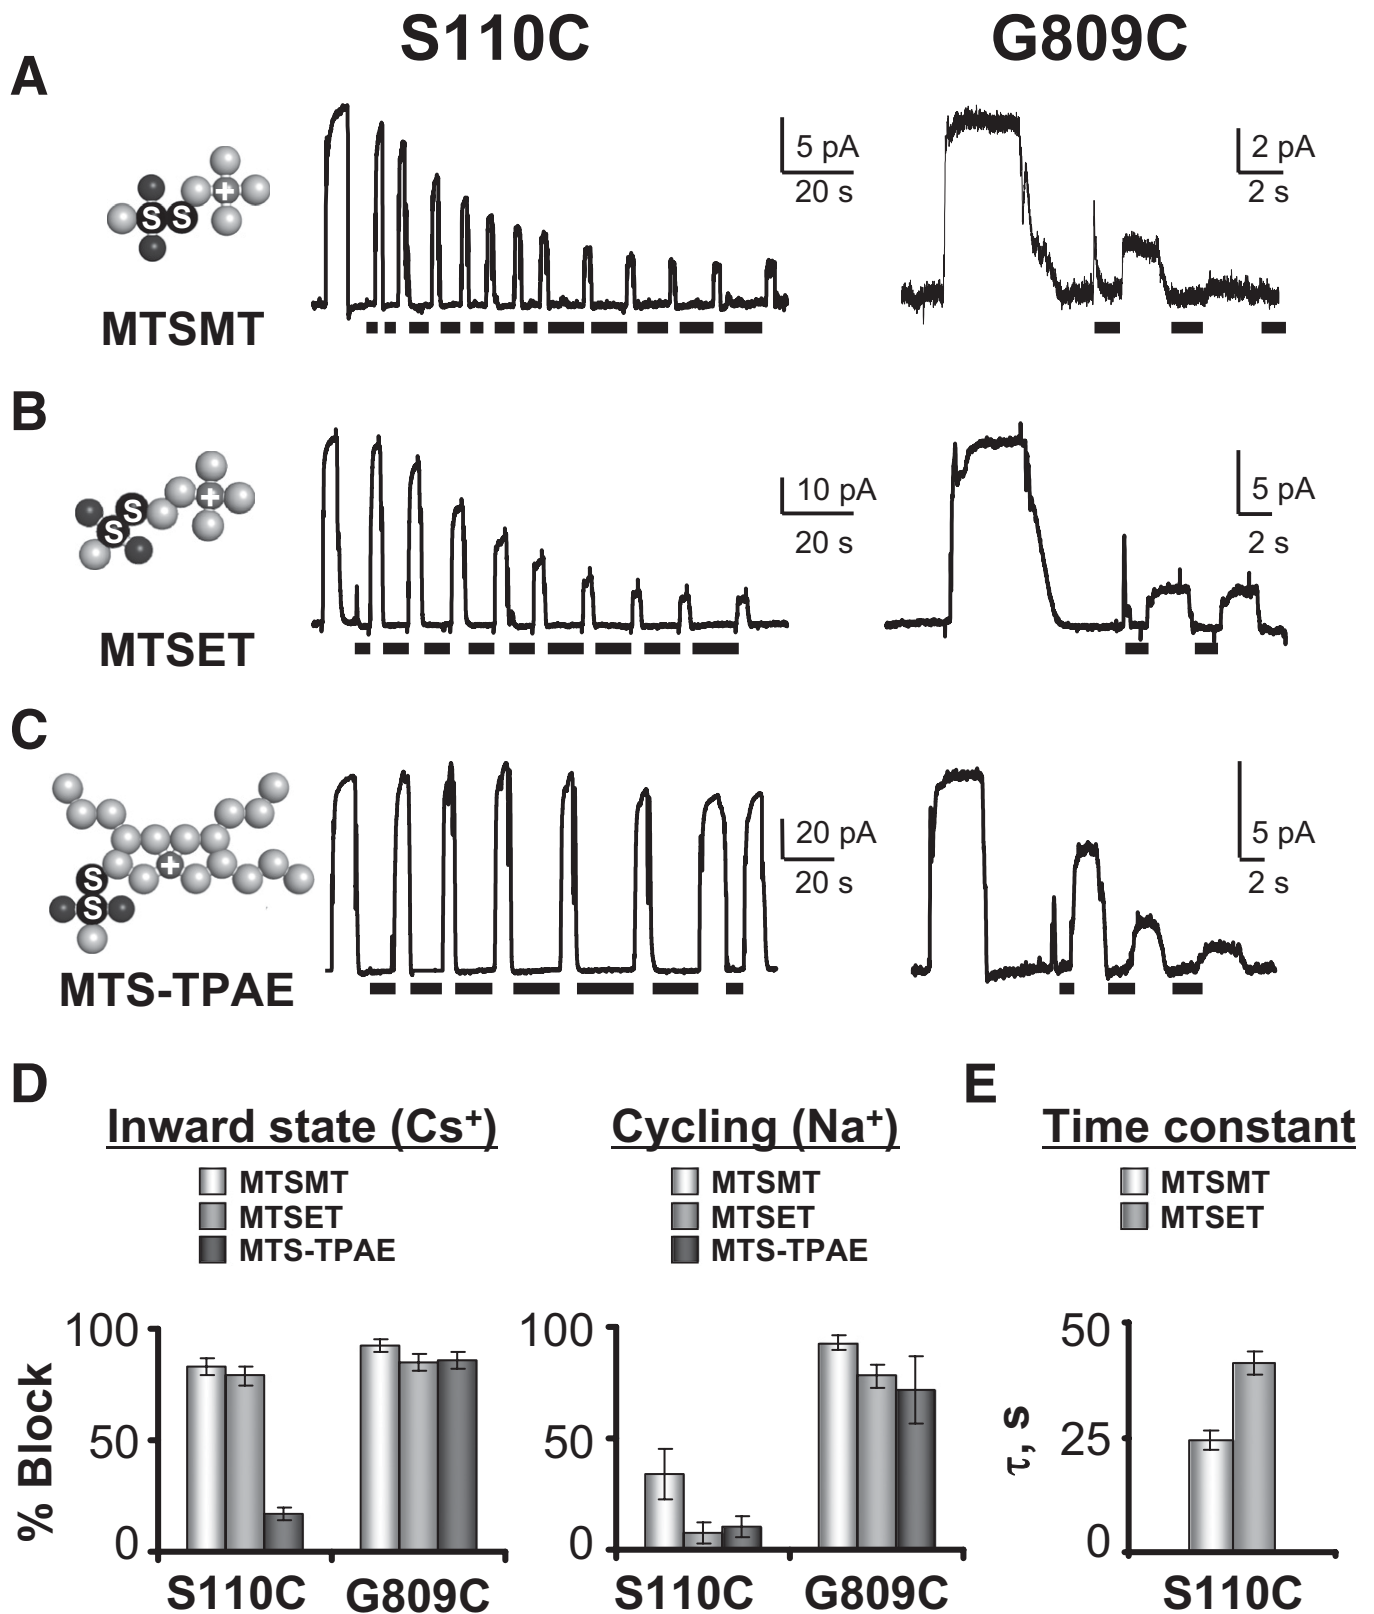

**Fig. S3.** The two cytoplasmic cavities of NCX1.1 have different sizes. Molecular models for 1-(Trimethylammonium)methyl Methanethiosulfonate Bromide (MTSMT<sup>+</sup>; A), MTSET<sup>+</sup> (B), and 2-(Tripropylammonium)ethyl Methanethiosulfonate Bromide (MTS-TPAE; C) reagents. MTSMT<sup>+</sup> is slightly shorter than MTSET<sup>+</sup> because of the presence of a methyl group instead of an ethyl chain. In contrast, the membrane-impermeable MTS-TPAE is significantly larger, being almost two times the size of both MTSMT<sup>+</sup> and MTSET<sup>+</sup>. The effects of MTSMT<sup>+</sup> (5 mM; A), MTSET<sup>+</sup> (5 mM; B), and MTS-TPAE (100 μM; C) on NCX1.1 currents when held in the inward configuration state are depicted. MTSMT<sup>+</sup> inhibited S110C exchanger current more rapidly than MTSET<sup>+</sup>, supporting the hypothesis of

Legend continued on following page

restricted accessibility at this location. The large MTS-TPAE did not cause S110C current inhibition while effectively blocking G809C currents. These results indicate that cysteines 110 and 809 are exposed to crevices of different sizes. The extent by which MTS reagents inhibited NCX1.1 mutant currents is summarized in *D*, whereas the rate of S110C block by MTSMT<sup>+</sup> and MTSET<sup>+</sup> is shown in *E*.
